# Supplementary material for: Silicon nanoparticles coated with nanoporous carbon as a promising anode material for lithium ion batteries
Source: Royal Society of Chemistry journal article supplement (doi:10.1039/d0nj03918g), 2020-01-01
Supplement: d0nj03918g1.pdf [file d0nj03918g1.pdf]

# Supporting Information for

## Silicon nanoparticles coated with nanoporous carbon as a promising anode material for lithium ion batteries

Hang Xu <sup>a, #</sup>, Mingtao Ding <sup>a, #</sup>, Dongni Li <sup>a</sup>, Yu Liu <sup>a</sup>, Yinshan Jiang <sup>a</sup>, Fangfei Li <sup>a</sup>,

Bing Xue <sup>a, \*</sup>

<sup>a</sup> Key Laboratory of Automobile Materials of Ministry of Education, and Department of Materials Science and Engineering, Jilin University, Changchun 130025, China

E-mail: xuebing2011@jlu.edu.cn (B. Xue)

**Table S1** Electrochemical performance comparison of Si/C-based anode materials in LIBs.

| Materials                 | Current density | Reversible capacity(mAh/g) | Cycle number | Capacity retention(%) | Refs      |
|---------------------------|-----------------|----------------------------|--------------|-----------------------|-----------|
| Si/C nano composites      | 2A/g            | 1790                       | 1000         | 83                    | [9]       |
| 3D-Si@SiO <sub>x</sub> /C | 0.2A/g          | 1635                       | 100          | 80                    | [12]      |
| Si@void@C                 | 0.2A/g          | 854                        | 200          | 62                    | [47]      |
| Si@void@C                 | 0.5A/g          | 1088                       | 300          | 55                    | [48]      |
| p-Si/SiOX/C               | 0.1C            | 740                        | 50           | 57                    | [49]      |
| Z-C@Si                    | 0.2C            | 2064                       | 100          | 63                    | This work |

### Reference

9. R. Zhang, Y. Du, D. Li, D. Shen, J. Yang, Z. Guo, H. K. Liu, A. A. Elzatahry and D. Zhao, *Adv. Mater.*, 2014, **26**, 6749-6755

12. J. Lee, J. Moon, S. A. Han, J. Kim, V. Malgras, Y. U. Heo, H. Kim, S. M. Lee, H. K. Liu, S. X. Dou, Y. Yamauchi, M. S. Park and J. H. Kim, *ACS Nano*, 2019, **13**, 9607-9619.
47. X. Chen, C. Chen, Y. Zhang, X. Zhang, D. Yang and A. Dong, *Nano Research*, 2018, **12**, 631-636.
48. J. Nzabanimana, S. Guo and X. Hu, *Appl. Surf. Sci.*, 2019, **479**, 287-295.
49. Z. Li, N. Yao, H. Zhao, Z. Yang, B. Fu and J. Wang, *J. Electrochem. Soc.*, 2020, **167**, 020555.
